# Supplementary material for: Environmental Mold and Mycotoxin Exposures Elicit Specific Cytokine and Chemokine Responses
Source: PubMed Central journal article supplement (PMC4444319; doi:10.1371/journal.pone.0126926), 2015-05-26
Supplement: pone.0126926.s001.pdf [file pone.0126926.s001.pdf]

Table VIIIA

## Total Fungal Spore (Non-Cultured) Ambient Air Sample Results

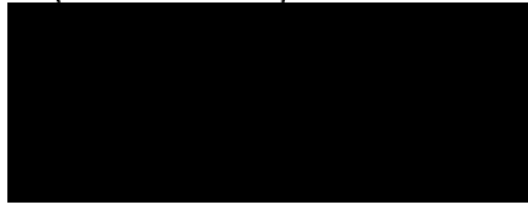Results reported in spores per cubic meter of air (spores/m<sup>3</sup>)

| Sample Number                    | 04-0046-0809-NV1                     | 04-0046-0809-NV2                     | 04-0046-0809-NV3                      | 04-0046-0809-NV4                               |
|----------------------------------|--------------------------------------|--------------------------------------|---------------------------------------|------------------------------------------------|
| Start Time                       | 08:54                                | 09:24                                | 09:47                                 | 10:08                                          |
| Sample Duration                  | 5 minutes                            | 5 minutes                            | 5 minutes                             | 5 minutes                                      |
| Sample Location                  | Outdoor control;<br>back parking lot | Lobby<br>(Before HVAC<br>Activation) | office<br>(Before HVAC<br>Activation) | Front desk area<br>(Before HVAC<br>Activation) |
| Alternaria                       | 13                                   | 347                                  | 187                                   | 120                                            |
| Arthrinium                       |                                      |                                      |                                       |                                                |
| Ascospores                       | 107                                  | 427                                  | 53                                    |                                                |
| Aureobasidium                    |                                      | 13                                   |                                       |                                                |
| Basidiospores                    | 213                                  | 960                                  | 320                                   | 320                                            |
| Beltrania                        |                                      |                                      |                                       |                                                |
| Bipolaris/Drechslera group       | 13                                   | 27                                   |                                       | 40                                             |
| Botrytis                         |                                      |                                      |                                       |                                                |
| Chaetomium                       | 27                                   | 13                                   | 13                                    | 13                                             |
| Cladosporium                     | 1,010                                | 2,190                                | 2,350                                 | 1,010                                          |
| Curvularia                       | 27                                   | 13                                   |                                       | 27                                             |
| Epicoccum                        | 27                                   | 53                                   | 40                                    | 13                                             |
| Fusarium                         |                                      |                                      |                                       |                                                |
| Myrothecium                      |                                      |                                      | 13                                    |                                                |
| Nigrospora                       |                                      |                                      |                                       |                                                |
| Oidium                           | 80                                   | 80                                   | 13                                    |                                                |
| Other brown                      | 53                                   | 53                                   | 53                                    |                                                |
| Penicillium/Aspergillus types    | 907                                  | 3,790                                | 44,500                                | 9,070                                          |
| Pithomyces                       |                                      |                                      |                                       | 13                                             |
| Rusts                            |                                      | 13                                   |                                       |                                                |
| Scopulariopsis                   |                                      |                                      | 13                                    |                                                |
| Smuts, Periconia,<br>Myxomycetes | 67                                   | 960                                  | 853                                   | 627                                            |
| Stachybotrys                     |                                      | 13                                   |                                       | 13                                             |
| Stemphylium                      |                                      |                                      | 13                                    | 13                                             |
| Torula                           |                                      |                                      | 13                                    | 27                                             |
| Trichocladium                    |                                      |                                      |                                       |                                                |
| Ulocladium                       |                                      |                                      |                                       |                                                |
| Zygomycetes                      |                                      |                                      |                                       |                                                |
| <b>TOTAL</b>                     | <b>2,544</b>                         | <b>8,952</b>                         | <b>48,434</b>                         | <b>11,306</b>                                  |

## Notes:

Unless otherwise noted, indoor air samples were collected at approximate center of room. All samples collected five feet above floor/ground.

Total mold counts may not precisely reflect sum of individual mold counts due to rounding.

Samples collected using Zefon Air-o-Cell cassettes.

## Legend:

N/A: Not applicable

Pacific Project No: [REDACTED]

Page 1 of 7

Table VIIIA

## Total Fungal Spore (Non-Cultured) Ambient Air Sample Results

Results reported in spores per cubic meter of air (spores/m<sup>3</sup>)

| Sample Number                    | 04-0046-0809-NV5                                 | 04-0046-0809-NV6                                   | 04-0046-0809-NV7                  | 04-0046-0809-NV8                      |
|----------------------------------|--------------------------------------------------|----------------------------------------------------|-----------------------------------|---------------------------------------|
| Start Time                       | 10:29                                            | 10:53                                              | 11:18                             | 12:03                                 |
| Sample Duration                  | 5 minutes                                        | 5 minutes                                          | 5 minutes                         | 5 minutes                             |
| Sample Location                  | ██████████ office<br>(Before HVAC<br>Activation) | System control desk<br>(Before HVAC<br>Activation) | Outdoor control; west<br>sidewalk | Lounge<br>(Before HVAC<br>Activation) |
| Alternaria                       | 80                                               | 80                                                 | 200                               | 27                                    |
| Arthrinium                       |                                                  |                                                    |                                   |                                       |
| Ascospores                       | 53                                               | 53                                                 | 2,610                             |                                       |
| Aureobasidium                    |                                                  |                                                    |                                   |                                       |
| Basidiospores                    | 267                                              | 320                                                | 1,010                             | 160                                   |
| Beltrania                        |                                                  |                                                    |                                   |                                       |
| Bipolaris/Drechslera group       | 13                                               |                                                    | 27                                |                                       |
| Botrytis                         |                                                  |                                                    |                                   |                                       |
| Chaetomium                       |                                                  | 27                                                 | 13                                | 27                                    |
| Cladosporium                     | 1,550                                            | 2,240                                              | 6,290                             | 907                                   |
| Curvularia                       |                                                  |                                                    |                                   | 13                                    |
| Epicoccum                        | 13                                               | 40                                                 | 80                                |                                       |
| Fusarium                         |                                                  |                                                    |                                   |                                       |
| Myrothecium                      |                                                  |                                                    |                                   |                                       |
| Nigrospora                       |                                                  |                                                    |                                   |                                       |
| Oidium                           |                                                  |                                                    | 13                                |                                       |
| Other brown                      |                                                  | 13                                                 | 13                                |                                       |
| Penicillium/Aspergillus types    | 11,600                                           | 11,800                                             | 9,070                             | 11,100                                |
| Pithomyces                       |                                                  |                                                    |                                   |                                       |
| Rusts                            |                                                  |                                                    |                                   |                                       |
| Scopulariopsis                   |                                                  |                                                    |                                   |                                       |
| Smuts, Periconia,<br>Myxomycetes | 293                                              | 267                                                | 240                               | 147                                   |
| Stachybotrys                     | 13                                               | 13                                                 | 40                                |                                       |
| Stemphylium                      |                                                  |                                                    | 13                                |                                       |
| Torula                           | 13                                               |                                                    | 40                                |                                       |
| Trichocladium                    |                                                  |                                                    |                                   |                                       |
| Ulocladium                       |                                                  |                                                    | 13                                |                                       |
| Zygomycetes                      |                                                  |                                                    |                                   |                                       |
| <b>TOTAL</b>                     | <b>13,895</b>                                    | <b>14,853</b>                                      | <b>19,672</b>                     | <b>12,381</b>                         |

## Notes:

Unless otherwise noted, indoor air samples were collected at approximate center of room. All samples collected five feet above floor/ground.

Total mold counts may not precisely reflect sum of individual mold counts due to rounding.

Samples collected using Zefon Air-o-Cell cassettes.

## Legend:

N/A: Not applicable

Pacific Project No. ██████████

Page 2 of 7

Table VIIIA

## Total Fungal Spore (Non-Cultured) Ambient Air Sample Results

Results reported in spores per cubic meter of air (spores/m<sup>3</sup>)

| Sample Number                    | 04-0046-0809-NV9                                    | 04-0046-0809-NV10                    | 04-0046-0809-NV11                             | 04-0046-0809-NV12                            |
|----------------------------------|-----------------------------------------------------|--------------------------------------|-----------------------------------------------|----------------------------------------------|
| Start Time                       | 12:26                                               | 12:48                                | 13:12                                         | 13:33                                        |
| Sample Duration                  | 5 minutes                                           | 5 minutes                            | 5 minutes                                     | 5 minutes                                    |
| Sample Location                  | Computer / Billing room<br>(Before HVAC Activation) | Outdoor control;<br>back parking lot | ██████████ office<br>(Before HVAC Activation) | Maintenance room<br>(Before HVAC Activation) |
| Alternaria                       | 27                                                  | 133                                  | 147                                           | 27                                           |
| Arthrimum                        |                                                     |                                      |                                               |                                              |
| Ascospores                       |                                                     |                                      | 53                                            | 53                                           |
| Aureobasidium                    |                                                     |                                      |                                               |                                              |
| Basidiospores                    | 107                                                 | 107                                  | 533                                           | 267                                          |
| Beltrania                        |                                                     |                                      | 13                                            |                                              |
| Bipolaris/Drechslera group       | 27                                                  | 40                                   | 13                                            | 13                                           |
| Botrytis                         |                                                     |                                      |                                               |                                              |
| Chaetomium                       |                                                     | 13                                   | 27                                            |                                              |
| Cladosporium                     | 480                                                 | 1,280                                | 1,870                                         | 1,650                                        |
| Curvularia                       |                                                     | 27                                   | 13                                            | 27                                           |
| Epicoccum                        | 13                                                  | 80                                   | 13                                            |                                              |
| Fusarium                         |                                                     |                                      |                                               |                                              |
| Myrothecium                      |                                                     |                                      |                                               |                                              |
| Nigrospora                       |                                                     |                                      |                                               |                                              |
| Oidium                           |                                                     | 67                                   |                                               | 13                                           |
| Other brown                      | 13                                                  | 53                                   | 120                                           | 53                                           |
| Penicillium/Aspergillus types    | 3,570                                               | 373                                  | 1,390                                         | 2,240                                        |
| Pithomyces                       |                                                     |                                      |                                               |                                              |
| Rusts                            |                                                     |                                      |                                               |                                              |
| Scopulariopsis                   |                                                     | 13                                   |                                               |                                              |
| Smuts, Periconia,<br>Myxomycetes | 40                                                  | 160                                  | 747                                           | 200                                          |
| Stachybotrys                     |                                                     | 13                                   | 27                                            |                                              |
| Stemphylium                      |                                                     | 13                                   | 13                                            |                                              |
| Torula                           |                                                     |                                      |                                               | 13                                           |
| Trichocladium                    |                                                     |                                      |                                               |                                              |
| Ulocladium                       |                                                     |                                      |                                               |                                              |
| Zygomycetes                      |                                                     |                                      |                                               |                                              |
| <b>TOTAL</b>                     | <b>4,277</b>                                        | <b>2,372</b>                         | <b>4,979</b>                                  | <b>4,556</b>                                 |

## Notes:

Unless otherwise noted, indoor air samples were collected at approximate center of room. All samples collected five feet above floor/ground.  
Total mold counts may not precisely reflect sum of individual mold counts due to rounding.  
Samples collected using Zefon Air-o-Cell cassettes.

## Legend:

N/A: Not applicable

Pacific Project No: ██████████

Page 3 of 7

Table VIIIA

## Total Fungal Spore (Non-Cultured) Ambient Air Sample Results

Results reported in spores per cubic meter of air (spores/m<sup>3</sup>)

| Sample Number                    | 04-0046-0809-NV13                    | 04-0046-0809-NV14                   | 04-0046-0809-NV15                               | 04-0046-0809-NV16                        |
|----------------------------------|--------------------------------------|-------------------------------------|-------------------------------------------------|------------------------------------------|
| Start Time                       | 14:10                                | 14:35                               | 14:53                                           | 15:13                                    |
| Sample Duration                  | 5 minutes                            | 5 minutes                           | 5 minutes                                       | 5 minutes                                |
| Sample Location                  | Outdoor control;<br>back parking lot | Lobby<br>(After HVAC<br>Activation) | ██████████ office<br>(After HVAC<br>Activation) | Front desk<br>(After HVAC<br>Activation) |
| Alternaria                       | 40                                   | 40                                  | 40                                              | 40                                       |
| Arthrinium                       |                                      |                                     |                                                 |                                          |
| Ascospores                       | 53                                   | 53                                  |                                                 | 53                                       |
| Aureobasidium                    |                                      |                                     |                                                 |                                          |
| Basidiospores                    | 107                                  | 213                                 | 160                                             | 160                                      |
| Beltrania                        |                                      |                                     |                                                 |                                          |
| Bipolaris/Drechslera group       |                                      | 13                                  |                                                 |                                          |
| Botrytis                         |                                      |                                     |                                                 |                                          |
| Chaetomium                       |                                      | 13                                  |                                                 | 13                                       |
| Cladosporium                     | 4,320                                | 3,630                               | 2,880                                           | 1,330                                    |
| Curvularia                       |                                      |                                     |                                                 | 13                                       |
| Epicoccum                        | 27                                   | 13                                  |                                                 | 13                                       |
| Fusarium                         |                                      |                                     |                                                 |                                          |
| Myrothecium                      |                                      | 13                                  | 13                                              |                                          |
| Nigrospora                       |                                      |                                     |                                                 |                                          |
| Oidium                           | 27                                   |                                     |                                                 | 13                                       |
| Other brown                      | 53                                   | 13                                  |                                                 | 53                                       |
| Penicillium/Aspergillus types    | 800                                  | 7,200                               | 13,700                                          | 3,840                                    |
| Pithomyces                       |                                      |                                     |                                                 |                                          |
| Rusts                            |                                      |                                     |                                                 |                                          |
| Scopulariopsis                   |                                      |                                     |                                                 |                                          |
| Smuts, Periconia,<br>Myxomycetes | 93                                   | 147                                 | 53                                              | 133                                      |
| Stachybotrys                     |                                      |                                     |                                                 |                                          |
| Stemphylium                      |                                      |                                     |                                                 |                                          |
| Torula                           |                                      |                                     |                                                 |                                          |
| Trichocladium                    |                                      |                                     |                                                 |                                          |
| Ulocladium                       |                                      |                                     |                                                 |                                          |
| Zygomycetes                      |                                      |                                     |                                                 |                                          |
| <b>TOTAL</b>                     | <b>5,520</b>                         | <b>11,348</b>                       | <b>16,846</b>                                   | <b>5,661</b>                             |

## Notes:

Unless otherwise noted, indoor air samples were collected at approximate center of room. All samples collected five feet above floor/ground.

Total mold counts may not precisely reflect sum of individual mold counts due to rounding.

Samples collected using Zefon Air-o-Cell cassettes.

## Legend:

N/A: Not applicable

Pacific Project No: ██████████

Page 4 of 7

Table VIIIA

Results reported in spores per cubic meter of air (spores/m<sup>3</sup>)

| Sample Number                    | 04-0046-0809-NV21                                  | 04-0046-0809-NV22                              | 04-0046-0809-NV23                           | 04-0046-0809-NV24                    |
|----------------------------------|----------------------------------------------------|------------------------------------------------|---------------------------------------------|--------------------------------------|
| Start Time                       | 16:46                                              | 17:04                                          | 17:22                                       | 17:45                                |
| Sample Duration                  | 5 minutes                                          | 5 minutes                                      | 5 minutes                                   | 5 minutes                            |
| Sample Location                  | Computer / Billing room<br>(After HVAC Activation) | Mike Blake's office<br>(After HVAC Activation) | Maintenance room<br>(After HVAC Activation) | Outdoor control;<br>back parking lot |
| Alternaria                       | 13                                                 | 53                                             | 13                                          | 40                                   |
| Arthrinium                       |                                                    |                                                |                                             |                                      |
| Ascospores                       |                                                    | 107                                            | 160                                         | 267                                  |
| Aureobasidium                    |                                                    |                                                |                                             |                                      |
| Basidiospores                    | 107                                                | 693                                            | 107                                         | 53                                   |
| Beltrania                        |                                                    |                                                |                                             |                                      |
| Bipolaris/Drechslera group       |                                                    |                                                |                                             |                                      |
| Botrytis                         |                                                    |                                                |                                             |                                      |
| Chaetomium                       |                                                    |                                                |                                             |                                      |
| Cladosporium                     | 747                                                | 1,650                                          | 1,170                                       | 3,040                                |
| Curvularia                       |                                                    | 13                                             |                                             | 13                                   |
| Epicoccum                        | 13                                                 | 40                                             |                                             |                                      |
| Fusarium                         |                                                    |                                                |                                             |                                      |
| Myrothecium                      |                                                    |                                                |                                             |                                      |
| Nigrospora                       |                                                    |                                                |                                             |                                      |
| Oldium                           | 27                                                 | 27                                             | 13                                          | 27                                   |
| Other brown                      | 13                                                 | 40                                             | 13                                          | 13                                   |
| Penicillium/Aspergillus types    | 1,600                                              | 1,280                                          | 1,120                                       | 693                                  |
| Pithomyces                       |                                                    |                                                |                                             |                                      |
| Rusts                            |                                                    |                                                |                                             |                                      |
| Scopulariopsis                   |                                                    |                                                |                                             |                                      |
| Smuts, Periconia,<br>Myxomycetes | 67                                                 | 347                                            | 107                                         | 27                                   |
| Stachybotrys                     |                                                    | 13                                             |                                             |                                      |
| Stemphylium                      |                                                    |                                                |                                             | 13                                   |
| Torula                           |                                                    |                                                |                                             |                                      |
| Trichocladium                    |                                                    | 13                                             |                                             |                                      |
| Ulocladium                       |                                                    |                                                |                                             |                                      |
| Zygomycetes                      |                                                    |                                                |                                             |                                      |
| <b>TOTAL</b>                     | <b>2,587</b>                                       | <b>4,276</b>                                   | <b>2,703</b>                                | <b>4,186</b>                         |

**Notes:**

Unless otherwise noted, indoor air samples were collected at approximate center of room. All samples collected five feet above floor/ground.  
Total mold counts may not precisely reflect sum of individual mold counts due to rounding.  
Samples collected using Zefon Air-o-Cell cassettes.

**Legend:**

N/A: Not applicable

Pacific Project No: [REDACTED]

Page 6 of 7

Table VIIIA

Total Fungal Spore (Non-Cultured) Ambient Air Sample Results

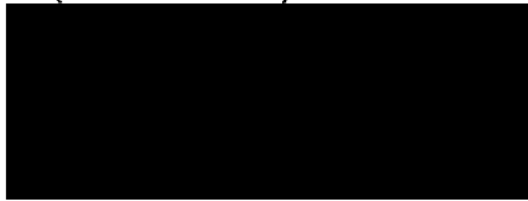

Results reported in spores per cubic meter of air (spores/m<sup>3</sup>)

| Sample Number                 | 04-0046-0809-NV25    | N/A | N/A | N/A |
|-------------------------------|----------------------|-----|-----|-----|
| Start Time                    | N/A                  |     |     |     |
| Sample Duration               | N/A                  |     |     |     |
| Sample Location               | Field Blank          |     |     |     |
| Alternaria                    |                      |     |     |     |
| Arthriniium                   |                      |     |     |     |
| Ascospores                    |                      |     |     |     |
| Aureobasidium                 |                      |     |     |     |
| Basidiospores                 |                      |     |     |     |
| Beltrania                     |                      |     |     |     |
| Bipolaris/Drechslera group    |                      |     |     |     |
| Botrytis                      |                      |     |     |     |
| Chaetomium                    |                      |     |     |     |
| Cladosporium                  |                      |     |     |     |
| Curvularia                    |                      |     |     |     |
| Epicoccum                     |                      |     |     |     |
| Fusarium                      |                      |     |     |     |
| Myrothecium                   |                      |     |     |     |
| Nigrospora                    |                      |     |     |     |
| Oidium                        |                      |     |     |     |
| Other brown                   |                      |     |     |     |
| Penicillium/Aspergillus types |                      |     |     |     |
| Pithomyces                    |                      |     |     |     |
| Rusts                         |                      |     |     |     |
| Scopulariopsis                |                      |     |     |     |
| Smuts, Periconia, Myxomycetes |                      |     |     |     |
| Stachybotrys                  |                      |     |     |     |
| Stemphylium                   |                      |     |     |     |
| Torula                        |                      |     |     |     |
| Trichocladium                 |                      |     |     |     |
| Ulocladium                    |                      |     |     |     |
| Zygomycetes                   |                      |     |     |     |
| <b>TOTAL</b>                  | <b>None detected</b> |     |     |     |

Notes:

Unless otherwise noted, indoor air samples were collected at approximate center of room. All samples collected five feet above floor/ground.  
 Total mold counts may not precisely reflect sum of individual mold counts due to rounding.  
 Samples collected using Zefon Air-o-Cell cassettes.

Legend:

N/A: Not applicable

Pacific Project No:

Table IXA

## Viable (Cultured) Fungi Ambient Air Sample Results

Results reported in colony forming units per cubic meter of air (cfu/m<sup>3</sup>)

| Sampling Location / Activities | Outdoor control; back parking lot |              | Lobby (Before HVAC Activation) |              | office (Before HVAC Activation) |              | Front desk area (Before HVAC Activation) |              |
|--------------------------------|-----------------------------------|--------------|--------------------------------|--------------|---------------------------------|--------------|------------------------------------------|--------------|
|                                | Sample Number                     | Sample Media | Sample Number                  | Sample Media | Sample Number                   | Sample Media | Sample Number                            | Sample Media |
|                                | 04-0046-0809-M1                   | MEA          | 04-0046-0809-D1                | DG18         | 04-0046-0809-M2                 | MEA          | 04-0046-0809-D3                          | DG18         |
|                                | 09:01/09:04                       | 08:54/08:57  | 09:31/09:34                    | 09:24/09:27  | 09:54/09:57                     | 09:47/09:50  | 10:15/10:18                              | 10:08/10:11  |
|                                | 3 minutes                         | 3 minutes    | 3 minutes                      | 3 minutes    | 3 minutes                       | 3 minutes    | 3 minutes                                | 3 minutes    |
| Alternaria                     |                                   |              |                                |              |                                 |              |                                          |              |
| Aspergillus flavus             | 12                                | 35           |                                |              |                                 |              |                                          |              |
| Aspergillus fumigatus          | 12                                |              |                                |              | 24                              |              |                                          |              |
| Aspergillus glaucus            |                                   |              |                                | 12           |                                 |              |                                          |              |
| Aspergillus nidulans           | 24                                | 12           |                                |              |                                 |              |                                          |              |
| Aspergillus niger              | 59                                | 59           | 35                             | 24           | 35                              | 24           | 35                                       | 12           |
| Aspergillus ochraceus          |                                   |              |                                |              |                                 |              |                                          |              |
| Aspergillus sydowii            |                                   | 12           |                                | 12           | 24                              |              | 71                                       | 59           |
| Aspergillus terreus            |                                   |              |                                |              |                                 |              |                                          |              |
| Aspergillus ustus              |                                   |              |                                |              |                                 |              |                                          |              |
| Aspergillus versicolor         |                                   | 35           | 530                            | 1,300        | 506                             | 1,240        | 931                                      | 1,680        |
| Aureobasidium                  |                                   |              |                                |              |                                 |              | 12                                       |              |
| Bipolaris/Drechslera           |                                   |              |                                |              |                                 |              |                                          |              |
| Cladosporium                   | 165                               | 165          | 71                             | 294          | 12                              | 71           | 118                                      | 12           |
| Epicoccum                      |                                   |              | 12                             |              |                                 |              |                                          |              |
| Fusarium                       |                                   |              |                                |              |                                 |              |                                          |              |
| Non-sporulating fungi          |                                   |              |                                |              |                                 |              |                                          |              |
| Paecilomyces                   |                                   |              |                                |              | 24                              | 12           | 12                                       | 12           |
| Penicillium brevicompactum     |                                   |              |                                |              |                                 |              |                                          |              |
| Penicillium chrysogenum        |                                   |              | 47                             |              | 94                              | 130          | 130                                      | 82           |
| Penicillium citrinum           |                                   |              | 12                             |              |                                 |              |                                          |              |
| Penicillium corylophilum       |                                   |              |                                |              |                                 |              |                                          |              |
| Penicillium decumbens          |                                   |              | 94                             | 271          | 188                             | 483          | 188                                      | 400          |
| Penicillium glabrum            |                                   |              |                                |              |                                 |              |                                          |              |
| Penicillium italicum           |                                   |              |                                |              |                                 |              |                                          |              |
| Penicillium paxilli            |                                   |              |                                | 47           |                                 |              |                                          |              |
| Penicillium purpurogenum       |                                   |              |                                |              |                                 |              |                                          |              |
| Penicillium species            | 12                                | 12           |                                |              |                                 |              |                                          |              |
| Phoma/Coelomycetes             | 59                                |              | 12                             |              |                                 |              |                                          |              |
| Rhizopus                       | 12                                |              |                                |              |                                 |              |                                          |              |
| Ulocladium                     |                                   | 12           |                                |              |                                 | 12           | 12                                       |              |
| Wallemia                       |                                   |              | 35                             |              |                                 |              | 177                                      |              |
| Yeasts                         |                                   |              |                                |              |                                 |              |                                          |              |
| <b>TOTAL</b>                   | <b>355</b>                        | <b>342</b>   | <b>848</b>                     | <b>1,960</b> | <b>907</b>                      | <b>1,972</b> | <b>1,686</b>                             | <b>2,257</b> |

Notes: Unless otherwise noted, indoor air samples were collected at approximate center of room. All samples collected approximately five feet above floor/ground. Total mold counts may not precisely reflect sum of individual mold counts due to positive hole correction.

## Legend:

DG18: Dichloran-glycerol agar  
 MEA: Malt extract agar  
 N/A: Not applicable

Pacific Project No: [REDACTED]

Page 1 of 7

Table IXA

## Viable (Cultured) Fungi Ambient Air Sample Results

Results reported in colony forming units per cubic meter of air (cfu/m<sup>3</sup>)

| Sampling Location / Activities | [REDACTED] office (Before HVAC Activation) |              | System control desk (Before HVAC Activation) |              | Outdoor control; west sidewalk |              | Lounge (Before HVAC Activation) |              |
|--------------------------------|--------------------------------------------|--------------|----------------------------------------------|--------------|--------------------------------|--------------|---------------------------------|--------------|
|                                | Sample Number                              | Sample Media | Sample Number                                | Sample Media | Sample Number                  | Sample Media | Sample Number                   | Sample Media |
|                                | 04-0046-0809-M5                            | DG18         | 04-0046-0809-D5                              | DG18         | 04-0046-0809-M6                | DG18         | 04-0046-0809-D6                 | DG18         |
|                                | 04-0046-0809-M7                            | MEA          | 04-0046-0809-D7                              | MEA          | 04-0046-0809-M8                | MEA          | 04-0046-0809-D8                 | DG18         |
| Start/Stop Time                | 10:37/10:40                                | 10:29/10:32  | 10:59/11:02                                  | 10:53/10:56  | 11:25/11:28                    | 11:18/11:21  | 12:11/12:14                     | 12:03/12:06  |
| Sample Duration                | 3 minutes                                  | 3 minutes    | 3 minutes                                    | 3 minutes    | 3 minutes                      | 3 minutes    | 3 minutes                       | 3 minutes    |
| Alternaria                     |                                            |              |                                              |              |                                |              |                                 |              |
| Aspergillus flavus             |                                            |              |                                              |              | 12                             |              |                                 |              |
| Aspergillus fumigatus          |                                            |              | 24                                           |              |                                |              |                                 |              |
| Aspergillus glaucus            |                                            |              |                                              |              |                                |              |                                 | 12           |
| Aspergillus nidulans           |                                            |              | 47                                           |              |                                |              | 35                              |              |
| Aspergillus niger              |                                            |              | 12                                           | 12           | 141                            | 153          | 24                              | 35           |
| Aspergillus ochraceus          |                                            |              |                                              |              |                                |              |                                 |              |
| Aspergillus sydowii            | 47                                         | 82           |                                              |              |                                |              |                                 | 12           |
| Aspergillus terreus            |                                            |              |                                              |              |                                |              |                                 |              |
| Aspergillus ustus              |                                            |              |                                              |              |                                |              |                                 |              |
| Aspergillus versicolor         | 506                                        | 1,300        | 907                                          | 1,740        |                                | 12           | 1,200                           | 1,480        |
| Aureobasidium                  |                                            |              |                                              |              |                                |              |                                 |              |
| Bipolaris/Drechslera           |                                            |              |                                              |              |                                |              |                                 |              |
| Cladosporium                   | 35                                         | 59           | 47                                           | 165          | 530                            | 836          | 118                             | 177          |
| Epicoccum                      |                                            |              |                                              |              | 71                             |              |                                 |              |
| Fusarium                       |                                            |              |                                              |              |                                |              |                                 |              |
| Non-sporulating fungi          |                                            |              |                                              |              |                                |              |                                 |              |
| Paecilomyces                   | 12                                         |              | 12                                           |              |                                |              |                                 |              |
| Penicillium brevicompactum     |                                            |              |                                              |              |                                |              |                                 |              |
| Penicillium chrysogenum        | 106                                        | 141          | 82                                           | 165          |                                |              | 118                             | 106          |
| Penicillium citrinum           |                                            |              |                                              |              |                                |              |                                 |              |
| Penicillium corylophilum       |                                            |              |                                              |              |                                |              |                                 |              |
| Penicillium decumbens          | 177                                        | 554          | 389                                          | 318          |                                |              | 130                             | 365          |
| Penicillium glabrum            |                                            |              |                                              |              |                                |              |                                 |              |
| Penicillium italicum           |                                            |              |                                              |              |                                |              |                                 |              |
| Penicillium paxilli            |                                            |              |                                              |              |                                |              |                                 |              |
| Penicillium purpurogenum       |                                            |              |                                              |              |                                |              |                                 |              |
| Penicillium species            |                                            |              | 12                                           |              | 12                             | 12           |                                 |              |
| Phoma/Coelomycetes             |                                            |              | 12                                           |              |                                |              | 12                              |              |
| Rhizopus                       | 12                                         |              |                                              |              |                                |              |                                 |              |
| Ulocladium                     |                                            |              |                                              |              |                                |              |                                 |              |
| Wallemia                       |                                            |              |                                              |              |                                |              | 35                              |              |
| Yeasts                         |                                            |              | 12                                           |              |                                | 12           |                                 |              |
| <b>TOTAL</b>                   | <b>895</b>                                 | <b>2,136</b> | <b>1,556</b>                                 | <b>2,400</b> | <b>766</b>                     | <b>1,025</b> | <b>1,672</b>                    | <b>2,187</b> |

Notes: Unless otherwise noted, indoor air samples were collected at approximate center of room. All samples collected approximately five feet above floor/ground. Total mold counts may not precisely reflect sum of individual mold counts due to positive hole correction.

## Legend:

DG18: Dichloran-glycerol agar  
 MEA: Malt extract agar  
 N/A: Not applicable

Pacific Project No: [REDACTED]

Page 2 of 7



Table IXA

## Viable (Cultured) Fungi Ambient Air Sample Results

Results reported in colony forming units per cubic meter of air (cfu/m<sup>3</sup>)

| Sampling Location / Activities | Computer / Billing room (Before HVAC Activation) |                 | Outdoor control; back parking lot |                  | [REDACTED] office (Before HVAC Activation) |                  | Maintenance room (Before HVAC Activation) |                  |
|--------------------------------|--------------------------------------------------|-----------------|-----------------------------------|------------------|--------------------------------------------|------------------|-------------------------------------------|------------------|
|                                | Sample Number                                    | Sample Media    | Start/Stop Time                   | Sample Duration  | Sample Number                              | Sample Media     | Start/Stop Time                           | Sample Duration  |
|                                | 04-0046-0809-M9                                  | 04-0046-0809-D9 | 04-0046-0809-M10                  | 04-0046-0809-D10 | 04-0046-0809-M11                           | 04-0046-0809-D11 | 04-0046-0809-M12                          | 04-0046-0809-D12 |
|                                | ME                                               | DG18            | ME                                | DG18             | ME                                         | DG18             | ME                                        | DG18             |
|                                | 12:33/12:36                                      | 12:26/12:29     | 12:55/12:58                       | 12:48/12:51      | 13:19/13:22                                | 13:12/13:15      | 13:42/13:45                               | 13:33/13:36      |
|                                | 3 minutes                                        | 3 minutes       | 3 minutes                         | 3 minutes        | 3 minutes                                  | 3 minutes        | 3 minutes                                 | 3 minutes        |
| Alternaria                     |                                                  |                 |                                   |                  |                                            |                  |                                           |                  |
| Aspergillus flavus             |                                                  |                 | 12                                | 12               |                                            | 12               |                                           |                  |
| Aspergillus fumigatus          | 24                                               |                 | 12                                |                  |                                            |                  | 12                                        |                  |
| Aspergillus glaucus            |                                                  |                 |                                   |                  |                                            |                  |                                           |                  |
| Aspergillus nidulans           |                                                  |                 |                                   | 12               |                                            |                  | 12                                        |                  |
| Aspergillus niger              | 12                                               | 47              | 24                                | 59               | 59                                         | 59               | 24                                        | 47               |
| Aspergillus ochraceus          |                                                  |                 |                                   |                  |                                            |                  |                                           |                  |
| Aspergillus sydowii            |                                                  | 12              |                                   |                  |                                            | 24               | 35                                        | 35               |
| Aspergillus terreus            |                                                  |                 |                                   |                  |                                            |                  |                                           |                  |
| Aspergillus ustus              |                                                  |                 |                                   |                  |                                            |                  |                                           |                  |
| Aspergillus versicolor         | 848                                              | 1,170           |                                   | 24               | 495                                        | 1,960            | 247                                       | 766              |
| Aureobasidium                  |                                                  |                 |                                   |                  |                                            |                  |                                           |                  |
| Bipolaris/Drechslera           |                                                  |                 | 12                                |                  |                                            |                  |                                           |                  |
| Cladosporium                   | 24                                               | 71              | 518                               | 495              | 47                                         | 389              | 177                                       | 200              |
| Epicoccum                      |                                                  |                 | 12                                |                  |                                            |                  | 12                                        |                  |
| Fusarium                       |                                                  |                 |                                   |                  |                                            |                  |                                           |                  |
| Non-sporulating fungi          |                                                  |                 | 12                                |                  |                                            |                  |                                           |                  |
| Paecilomyces                   |                                                  |                 |                                   |                  | 47                                         |                  | 24                                        | 24               |
| Penicillium brevicompactum     |                                                  |                 |                                   |                  |                                            |                  |                                           |                  |
| Penicillium chrysogenum        | 118                                              | 71              |                                   |                  | 35                                         | 47               | 24                                        |                  |
| Penicillium citrinum           |                                                  |                 |                                   |                  |                                            |                  |                                           |                  |
| Penicillium corylophilum       |                                                  |                 |                                   |                  |                                            |                  |                                           | 12               |
| Penicillium decumbens          | 118                                              | 177             |                                   |                  | 59                                         | 82               | 35                                        | 82               |
| Penicillium glabrum            |                                                  |                 | 12                                |                  |                                            |                  |                                           |                  |
| Penicillium italicum           |                                                  |                 | 24                                |                  |                                            |                  |                                           |                  |
| Penicillium paxilli            |                                                  |                 |                                   |                  |                                            |                  |                                           |                  |
| Penicillium purpurogenum       |                                                  |                 | 12                                |                  |                                            |                  |                                           |                  |
| Penicillium species            |                                                  |                 |                                   | 12               |                                            |                  |                                           |                  |
| Phoma/Coelomycetes             |                                                  |                 | 24                                | 12               |                                            |                  | 24                                        |                  |
| Rhizopus                       |                                                  |                 |                                   | 12               | 12                                         |                  |                                           |                  |
| Ulocladium                     |                                                  |                 |                                   |                  |                                            |                  |                                           |                  |
| Wallemia                       | 118                                              |                 |                                   | 12               |                                            |                  | 82                                        | 12               |
| Yeasts                         |                                                  |                 | 12                                | 12               |                                            |                  |                                           |                  |
| <b>TOTAL</b>                   | <b>1,262</b>                                     | <b>1,548</b>    | <b>686</b>                        | <b>662</b>       | <b>754</b>                                 | <b>2,573</b>     | <b>708</b>                                | <b>1,178</b>     |

Notes: Unless otherwise noted, indoor air samples were collected at approximate center of room. All samples collected approximately five feet above floor/ground. Total mold counts may not precisely reflect sum of individual mold counts due to positive hole correction.

## Legend:

DG18: Dichloran-glycerol agar  
 MEA: Malt extract agar  
 N/A: Not applicable

Pacific Project No: [REDACTED]

Page 3 of 7

Table IXA

Viable (Cultured) Fungi Ambient Air Sample Results

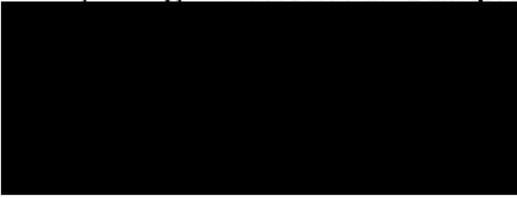

Results reported in colony forming units per cubic meter of air (cfu/m<sup>3</sup>)

| Sampling Location / Activities | Outdoor control; back parking lot |              | Lobby (After HVAC Activation) |              | [Redacted] office (After HVAC Activation) |              | Front desk (After HVAC Activation) |              |
|--------------------------------|-----------------------------------|--------------|-------------------------------|--------------|-------------------------------------------|--------------|------------------------------------|--------------|
|                                | Sample Number                     | Sample Media | Sample Number                 | Sample Media | Sample Number                             | Sample Media | Sample Number                      | Sample Media |
|                                | 04-0046-0809-M13                  | MEA          | 04-0046-0809-D13              | DG18         | 04-0046-0809-M14                          | MEA          | 04-0046-0809-D14                   | DG18         |
|                                | 04-0046-0809-M15                  | MEA          | 04-0046-0809-D15              | DG18         | 04-0046-0809-M16                          | MEA          | 04-0046-0809-D16                   | DG18         |
| Start/Stop Time                | 14:17/14:20                       |              | 14:10/14:13                   |              | 14:41/14:44                               |              | 14:35/14:38                        |              |
| Sample Duration                | 3 minutes                         |              | 3 minutes                     |              | 3 minutes                                 |              | 3 minutes                          |              |
| Alternaria                     |                                   |              |                               |              |                                           |              |                                    |              |
| Aspergillus flavus             |                                   |              |                               |              | 12                                        |              |                                    |              |
| Aspergillus fumigatus          |                                   |              |                               |              |                                           |              |                                    |              |
| Aspergillus glaucus            |                                   |              |                               |              |                                           |              |                                    |              |
| Aspergillus nidulans           |                                   |              |                               |              |                                           |              | 12                                 |              |
| Aspergillus niger              | 24                                |              | 118                           |              |                                           |              |                                    | 24           |
| Aspergillus ochraceus          |                                   |              |                               |              |                                           |              |                                    |              |
| Aspergillus sydowii            |                                   |              |                               |              | 12                                        |              | 24                                 | 12           |
| Aspergillus terreus            |                                   |              |                               |              |                                           |              |                                    |              |
| Aspergillus ustus              |                                   |              |                               |              |                                           |              |                                    |              |
| Aspergillus versicolor         |                                   |              |                               |              | 259                                       |              | 188                                | 59           |
| Aureobasidium                  |                                   |              |                               |              |                                           |              |                                    |              |
| Bipolaris/Drechslera           |                                   |              |                               |              |                                           |              |                                    |              |
| Cladosporium                   | 789                               |              | 660                           |              | 59                                        |              | 577                                | 82           |
| Epicoccum                      | 35                                |              |                               |              | 12                                        |              |                                    |              |
| Fusarium                       |                                   |              |                               |              |                                           |              |                                    |              |
| Non-sporulating fungi          |                                   |              |                               |              | 12                                        |              |                                    |              |
| Paecilomyces                   |                                   |              |                               |              |                                           |              |                                    |              |
| Penicillium brevicompactum     |                                   |              |                               |              |                                           |              |                                    |              |
| Penicillium chrysogenum        | 24                                |              | 47                            |              | 3,310                                     |              | 3,660                              | 3,220        |
| Penicillium citrinum           |                                   |              |                               |              |                                           |              |                                    |              |
| Penicillium corylophilum       |                                   |              |                               |              | 24                                        |              | 118                                |              |
| Penicillium decumbens          | 35                                |              | 12                            |              |                                           |              | 141                                | 153          |
| Penicillium glabrum            |                                   |              |                               |              |                                           |              |                                    |              |
| Penicillium italicum           |                                   |              |                               |              |                                           |              |                                    |              |
| Penicillium paxilli            |                                   |              |                               |              |                                           |              |                                    |              |
| Penicillium purpurogenum       |                                   |              |                               |              |                                           |              |                                    |              |
| Penicillium species            |                                   |              |                               |              |                                           |              |                                    |              |
| Phoma/Coelomycetes             | 24                                |              |                               |              |                                           |              |                                    |              |
| Rhizopus                       | 12                                |              |                               |              |                                           |              |                                    |              |
| Ulocladium                     |                                   |              |                               |              |                                           |              |                                    |              |
| Wallemia                       |                                   |              |                               |              |                                           |              |                                    |              |
| Yeasts                         |                                   |              |                               |              |                                           |              |                                    |              |
| <b>TOTAL</b>                   | <b>943</b>                        |              | <b>837</b>                    |              | <b>3,417</b>                              |              | <b>4,661</b>                       | <b>3,420</b> |
|                                |                                   |              |                               |              |                                           |              | <b>2,834</b>                       | <b>1,142</b> |
|                                |                                   |              |                               |              |                                           |              |                                    | <b>1,875</b> |

Notes: Unless otherwise noted, indoor air samples were collected at approximate center of room. All samples collected approximately five feet above floor/ground. Total mold counts may not precisely reflect sum of individual mold counts due to positive hole correction.

Legend:

- DG18: Dichloran-glycerol agar
- MEA: Malt extract agar
- N/A: Not applicable

Pacific Project No: 04-0046  
Page 4 of 7

Table IXA

## Viable (Cultured) Fungi Ambient Air Sample Results

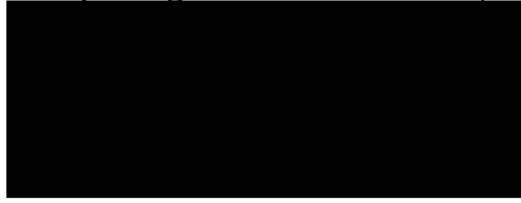Results reported in colony forming units per cubic meter of air (cfu/m<sup>3</sup>)

| Sampling Location / Activities | office (After HVAC Activation) |                  | System control desk (After HVAC Activation) |                  | Lounge (After HVAC Activation) |                  | Outdoor control; west sidewalk |                  |
|--------------------------------|--------------------------------|------------------|---------------------------------------------|------------------|--------------------------------|------------------|--------------------------------|------------------|
| Sample Number                  | 04-0046-0809-M17               | 04-0046-0809-D17 | 04-0046-0809-M18                            | 04-0046-0809-D18 | 04-0046-0809-M19               | 04-0046-0809-D19 | 04-0046-0809-M20               | 04-0046-0809-D20 |
| Sample Media                   | MEA                            | DG18             | MEA                                         | DG18             | MEA                            | DG18             | MEA                            | DG18             |
| Start/Stop Time                | 15:36/15:39                    | 15:30/15:33      | 15:55/15:58                                 | 15:48/15:51      | 16:11/16:14                    | 16:05/16:08      | 16:31/16:34                    | 16:36/16:39      |
| Sample Duration                | 3 minutes                      | 3 minutes        | 3 minutes                                   | 3 minutes        | 3 minutes                      | 3 minutes        | 3 minutes                      | 3 minutes        |
| Alternaria                     |                                |                  |                                             |                  |                                |                  | 24                             |                  |
| Aspergillus flavus             |                                |                  |                                             |                  |                                |                  |                                | 12               |
| Aspergillus fumigatus          |                                |                  |                                             |                  |                                |                  | 35                             |                  |
| Aspergillus glaucus            |                                |                  |                                             |                  |                                |                  |                                | 12               |
| Aspergillus nidulans           |                                |                  |                                             |                  | 12                             |                  |                                |                  |
| Aspergillus niger              | 12                             |                  | 35                                          |                  |                                | 24               | 165                            | 47               |
| Aspergillus ochraceus          |                                |                  |                                             |                  |                                |                  |                                | 12               |
| Aspergillus sydowii            |                                |                  |                                             |                  |                                |                  |                                |                  |
| Aspergillus terreus            |                                |                  |                                             |                  |                                |                  |                                | 12               |
| Aspergillus ustus              |                                |                  |                                             |                  |                                |                  |                                |                  |
| Aspergillus versicolor         | 12                             | 106              | 59                                          | 165              | 130                            | 224              |                                | 12               |
| Aureobasidium                  |                                |                  |                                             |                  |                                |                  |                                | 24               |
| Bipolaris/Drechslera           |                                |                  |                                             |                  |                                |                  |                                |                  |
| Cladosporium                   | 82                             | 165              | 141                                         | 47               | 71                             | 165              | 1,200                          | 1,480            |
| Epicoccum                      |                                |                  |                                             |                  |                                |                  | 24                             |                  |
| Fusarium                       |                                |                  |                                             |                  |                                |                  |                                |                  |
| Non-sporulating fungi          |                                |                  |                                             |                  |                                |                  |                                | 12               |
| Paecilomyces                   |                                |                  |                                             |                  |                                |                  |                                |                  |
| Penicillium brevicompactum     |                                |                  |                                             |                  |                                |                  |                                | 12               |
| Penicillium chrysogenum        | 1,140                          | 1,520            | 660                                         | 895              | 589                            |                  | 12                             | 35               |
| Penicillium citrinum           |                                |                  |                                             |                  |                                |                  |                                |                  |
| Penicillium corylophilum       |                                |                  |                                             |                  |                                | 612              |                                |                  |
| Penicillium decumbens          | 24                             | 118              | 82                                          | 106              | 59                             |                  | 35                             |                  |
| Penicillium glabrum            |                                |                  |                                             |                  |                                |                  |                                |                  |
| Penicillium italicum           |                                |                  |                                             |                  |                                |                  |                                |                  |
| Penicillium paxilli            |                                |                  |                                             |                  |                                |                  |                                |                  |
| Penicillium purpurogenum       |                                |                  |                                             |                  |                                |                  |                                |                  |
| Penicillium species            |                                |                  |                                             |                  |                                |                  | 12                             | 12               |
| Phoma/Coelomycetes             |                                |                  |                                             | 12               |                                |                  |                                | 35               |
| Rhizopus                       | 12                             |                  |                                             |                  |                                |                  | 12                             |                  |
| Ulocladium                     |                                |                  |                                             |                  |                                |                  |                                |                  |
| Wallemia                       |                                |                  |                                             |                  |                                |                  |                                | 12               |
| Yeasts                         |                                |                  |                                             |                  |                                |                  | 12                             |                  |
| <b>TOTAL</b>                   | <b>1,282</b>                   | <b>1,909</b>     | <b>977</b>                                  | <b>1,225</b>     | <b>861</b>                     | <b>1,025</b>     | <b>1,531</b>                   | <b>1,729</b>     |

Notes: Unless otherwise noted, indoor air samples were collected at approximate center of room. All samples collected approximately five feet above floor/ground. Total mold counts may not precisely reflect sum of individual mold counts due to positive hole correction.

## Legend:

DG18: Dichloran-glycerol agar  
 MEA: Malt extract agar  
 N/A: Not applicable

Pacific Project No: [REDACTED]

Page 5 of 7

Table IXA

Viable (Cultured) Fungi Ambient Air Sample Results

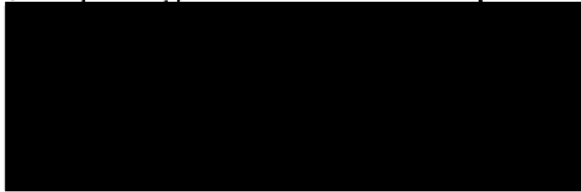

Results reported in colony forming units per cubic meter of air (cfu/m<sup>3</sup>)

| Sampling Location / Activities | Computer / Billing room (After HVAC Activation) |                  | [Redacted] office (After HVAC Activation) |                  | Maintenance room (After HVAC Activation) |                  | Outdoor control; back parking lot |                  |
|--------------------------------|-------------------------------------------------|------------------|-------------------------------------------|------------------|------------------------------------------|------------------|-----------------------------------|------------------|
|                                | Sample Number                                   | Sample Media     | Sample Number                             | Sample Media     | Sample Number                            | Sample Media     | Sample Number                     | Sample Media     |
|                                | 04-0046-0809-M21                                | 04-0046-0809-D21 | 04-0046-0809-M22                          | 04-0046-0809-D22 | 04-0046-0809-M23                         | 04-0046-0809-D23 | 04-0046-0809-M24                  | 04-0046-0809-D24 |
|                                | MEA                                             | DG18             | MEA                                       | DG18             | MEA                                      | DG18             | MEA                               | DG18             |
|                                | 16:51/16:54                                     | 16:46/16:49      | 17:10/17:13                               | 17:04/17:07      | 17:29/17:32                              | 17:22/17:25      | 17:51/17:54                       | 17:45/17:48      |
|                                | 3 minutes                                       | 3 minutes        | 3 minutes                                 | 3 minutes        | 3 minutes                                | 3 minutes        | 3 minutes                         | 3 minutes        |
| Alternaria                     |                                                 |                  |                                           |                  |                                          |                  | 12                                |                  |
| Aspergillus flavus             |                                                 |                  |                                           |                  |                                          |                  |                                   |                  |
| Aspergillus fumigatus          | 24                                              | 12               | 24                                        |                  | 12                                       |                  |                                   |                  |
| Aspergillus glaucus            |                                                 |                  |                                           |                  |                                          |                  |                                   |                  |
| Aspergillus nidulans           |                                                 |                  |                                           |                  |                                          |                  |                                   |                  |
| Aspergillus niger              |                                                 | 12               | 24                                        | 24               | 12                                       |                  | 12                                | 12               |
| Aspergillus ochraceus          |                                                 |                  |                                           |                  |                                          |                  | 12                                |                  |
| Aspergillus sydowii            | 12                                              | 12               |                                           |                  |                                          |                  |                                   |                  |
| Aspergillus terreus            |                                                 |                  |                                           |                  |                                          |                  |                                   |                  |
| Aspergillus ustus              |                                                 |                  | 12                                        |                  |                                          |                  |                                   |                  |
| Aspergillus versicolor         | 188                                             | 283              | 400                                       | 660              | 106                                      | 448              |                                   | 12               |
| Aureobasidium                  |                                                 | 12               |                                           |                  |                                          |                  |                                   |                  |
| Bipolaris/Drechslera           |                                                 |                  | 12                                        |                  |                                          |                  |                                   |                  |
| Cladosporium                   | 94                                              | 71               | 224                                       | 294              | 118                                      | 165              | 1,240                             | 1,300            |
| Epicoccum                      | 12                                              |                  |                                           |                  |                                          |                  | 24                                |                  |
| Fusarium                       |                                                 |                  |                                           |                  | 35                                       |                  | 24                                | 24               |
| Non-sporulating fungi          |                                                 |                  |                                           |                  |                                          |                  |                                   | 12               |
| Paecilomyces                   |                                                 |                  |                                           |                  |                                          |                  |                                   | 12               |
| Penicillium brevicompactum     |                                                 |                  |                                           | 24               |                                          |                  | 47                                |                  |
| Penicillium chrysogenum        | 353                                             | 436              | 247                                       | 118              | 118                                      | 259              |                                   | 24               |
| Penicillium citrinum           |                                                 |                  |                                           |                  |                                          |                  |                                   |                  |
| Penicillium corylophilum       |                                                 |                  |                                           | 35               |                                          |                  |                                   |                  |
| Penicillium decumbens          | 71                                              |                  | 35                                        | 106              |                                          |                  |                                   |                  |
| Penicillium glabrum            |                                                 |                  |                                           |                  |                                          |                  |                                   |                  |
| Penicillium italicum           |                                                 |                  |                                           |                  |                                          |                  | 24                                |                  |
| Penicillium paxilli            |                                                 |                  |                                           |                  |                                          |                  |                                   |                  |
| Penicillium purpurogenum       |                                                 |                  |                                           |                  |                                          |                  |                                   |                  |
| Penicillium species            |                                                 |                  | 12                                        |                  |                                          |                  |                                   | 12               |
| Phoma/Coelomycetes             |                                                 |                  |                                           | 12               |                                          |                  | 24                                | 47               |
| Rhizopus                       |                                                 |                  |                                           |                  |                                          |                  |                                   |                  |
| Ulocladium                     |                                                 |                  |                                           |                  |                                          |                  |                                   |                  |
| Wallemia                       | 47                                              |                  | 12                                        |                  |                                          |                  |                                   |                  |
| Yeasts                         |                                                 |                  |                                           |                  | 12                                       |                  | 12                                | 12               |
| <b>TOTAL</b>                   | <b>801</b>                                      | <b>838</b>       | <b>1,002</b>                              | <b>1,273</b>     | <b>413</b>                               | <b>872</b>       | <b>1,431</b>                      | <b>1,467</b>     |

Notes: Unless otherwise noted, indoor air samples were collected at approximate center of room. All samples collected approximately five feet above floor/ground. Total mold counts may not precisely reflect sum of individual mold counts due to positive hole correction.

Legend:

- DG18: Dichloran-glycerol agar
- MEA: Malt extract agar
- N/A: Not applicable

Table IXA

Viable (Cultured) Fungi Ambient Air Sample Results

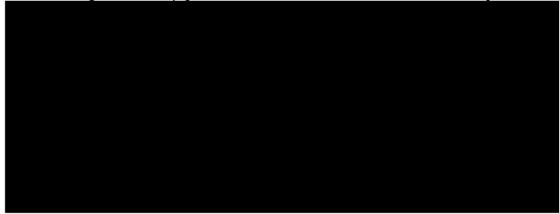

Results reported in colony forming units per cubic meter of air (cfu/m<sup>3</sup>)

| Sampling Location / Activities | Field Blank      |                  | N/A |  | N/A |  | N/A |  |
|--------------------------------|------------------|------------------|-----|--|-----|--|-----|--|
|                                | 04-0046-0809-M25 | 04-0046-0809-D25 |     |  |     |  |     |  |
| Sample Number                  | 04-0046-0809-M25 | 04-0046-0809-D25 |     |  |     |  |     |  |
| Sample Media                   | MEA              | DG18             |     |  |     |  |     |  |
| Start/Stop Time                | N/A              | N/A              |     |  |     |  |     |  |
| Sample Duration                | N/A              | N/A              |     |  |     |  |     |  |
| Alternaria                     |                  |                  |     |  |     |  |     |  |
| Aspergillus flavus             |                  |                  |     |  |     |  |     |  |
| Aspergillus fumigatus          |                  |                  |     |  |     |  |     |  |
| Aspergillus glaucus            |                  |                  |     |  |     |  |     |  |
| Aspergillus nidulans           |                  |                  |     |  |     |  |     |  |
| Aspergillus niger              |                  |                  |     |  |     |  |     |  |
| Aspergillus ochraceus          |                  |                  |     |  |     |  |     |  |
| Aspergillus sydowii            |                  |                  |     |  |     |  |     |  |
| Aspergillus terreus            |                  |                  |     |  |     |  |     |  |
| Aspergillus ustus              |                  |                  |     |  |     |  |     |  |
| Aspergillus versicolor         |                  |                  |     |  |     |  |     |  |
| Aureobasidium                  |                  |                  |     |  |     |  |     |  |
| Bipolaris/Drechslera           |                  |                  |     |  |     |  |     |  |
| Cladosporium                   |                  |                  |     |  |     |  |     |  |
| Epicoccum                      |                  |                  |     |  |     |  |     |  |
| Fusarium                       |                  |                  |     |  |     |  |     |  |
| Non-sporulating fungi          |                  |                  |     |  |     |  |     |  |
| Paecilomyces                   |                  |                  |     |  |     |  |     |  |
| Penicillium brevicompactum     |                  |                  |     |  |     |  |     |  |
| Penicillium chrysogenum        |                  |                  |     |  |     |  |     |  |
| Penicillium citrinum           |                  |                  |     |  |     |  |     |  |
| Penicillium corylophilum       |                  |                  |     |  |     |  |     |  |
| Penicillium decumbens          |                  |                  |     |  |     |  |     |  |
| Penicillium glabrum            |                  |                  |     |  |     |  |     |  |
| Penicillium italicum           |                  |                  |     |  |     |  |     |  |
| Penicillium paxilli            |                  |                  |     |  |     |  |     |  |
| Penicillium purpurogenum       |                  |                  |     |  |     |  |     |  |
| Penicillium species            |                  |                  |     |  |     |  |     |  |
| Phoma/Coelomycetes             |                  |                  |     |  |     |  |     |  |
| Rhizopus                       |                  |                  |     |  |     |  |     |  |
| Ulocladium                     |                  |                  |     |  |     |  |     |  |
| Wallemia                       |                  |                  |     |  |     |  |     |  |
| Yeasts                         |                  |                  |     |  |     |  |     |  |
| <b>TOTAL</b>                   | <b>&lt;12</b>    | <b>&lt;12</b>    |     |  |     |  |     |  |

Notes: Unless otherwise noted, indoor air samples were collected at approximate center of room. All samples collected approximately five feet above floor/ground. Total mold counts may not precisely reflect sum of individual mold counts due to positive hole correction.

Legend:

- DG18: Dichloran-glycerol agar
- MEA: Malt extract agar
- N/A: Not applicable
